# Supplementary material for: The Control of the Crossover Localization in Allium
Source: MDPI journal article supplement (doi:10.3390/ijms24087066), 2023-04-11
Supplement: s1 [file s1]

# Supporting Information

## The Control of the Crossover Localization in *Allium*

**SI Index:** Supporting information for this manuscript includes the following items:

- 1) Figure S1. Trivalent scheme in F<sub>1</sub> triploid (*A. cepa* × *A. fistulosum*) hybrid ( $2n = 3x = 16F+8C$ )
- 2) Figure S2. Synaptonemal complex formation in *A. cepa*
- 3) Figure S3. Synaptonemal complex formation in *A. fistulosum*
- 4) Figure S4. Synaptonemal complex formation in F<sub>1</sub> diploid hybrid (*A. cepa* × *A. fistulosum*) ( $2n = 2x = 8F+8C$ )
- 5) Figure S5. Synaptonemal complex formation in F<sub>1</sub> triploid hybrid (*A. cepa* × *A. fistulosum*) ( $2n = 3x = 16F+8C$ )
- 6) Figure S6. Distribution of all possible combinations of MLH1/MUS81 mean foci number ratio in analyzed cells
- 7) Table S1. Pairwise comparisons of the mean foci number per cell for MLH1 and MUS81

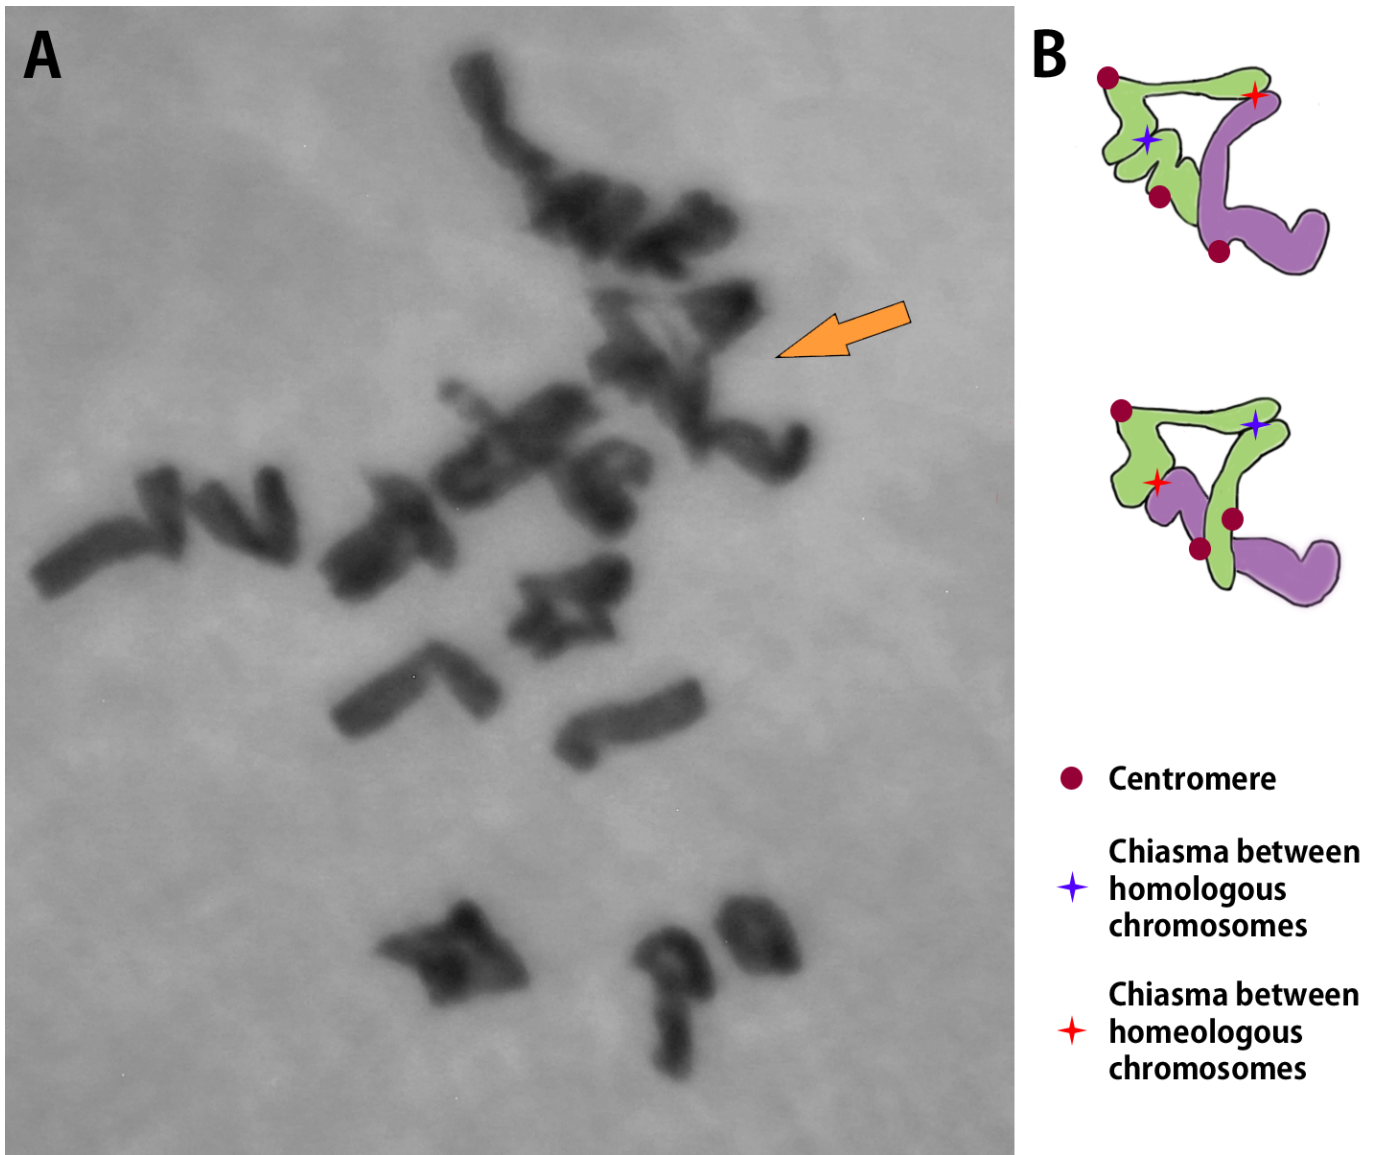

**Figure S1.** Meiotic metaphase I of F<sub>1</sub> triploid hybrid (*A. cepa* × *A. fistulosum*) ( $2n = 3x = 16F+8C$ ) with trivalent (arrow) (**A**) and graphical interpretation of possible conformation of this trivalent (**B**). According to the first trivalent scheme: the homologous chromosomes of *A. fistulosum* (green) formed a chiasma in the short arm, and the chromosome of *A. cepa* (violet) formed a chiasma with the chromosome of *A. fistulosum* in the long arm. According to the second scheme: the *A. cepa* and *A. fistulosum* chromosomes formed a chiasma in the short arm, while two homologous of *A. fistulosum* formed a chiasma in the long arm.

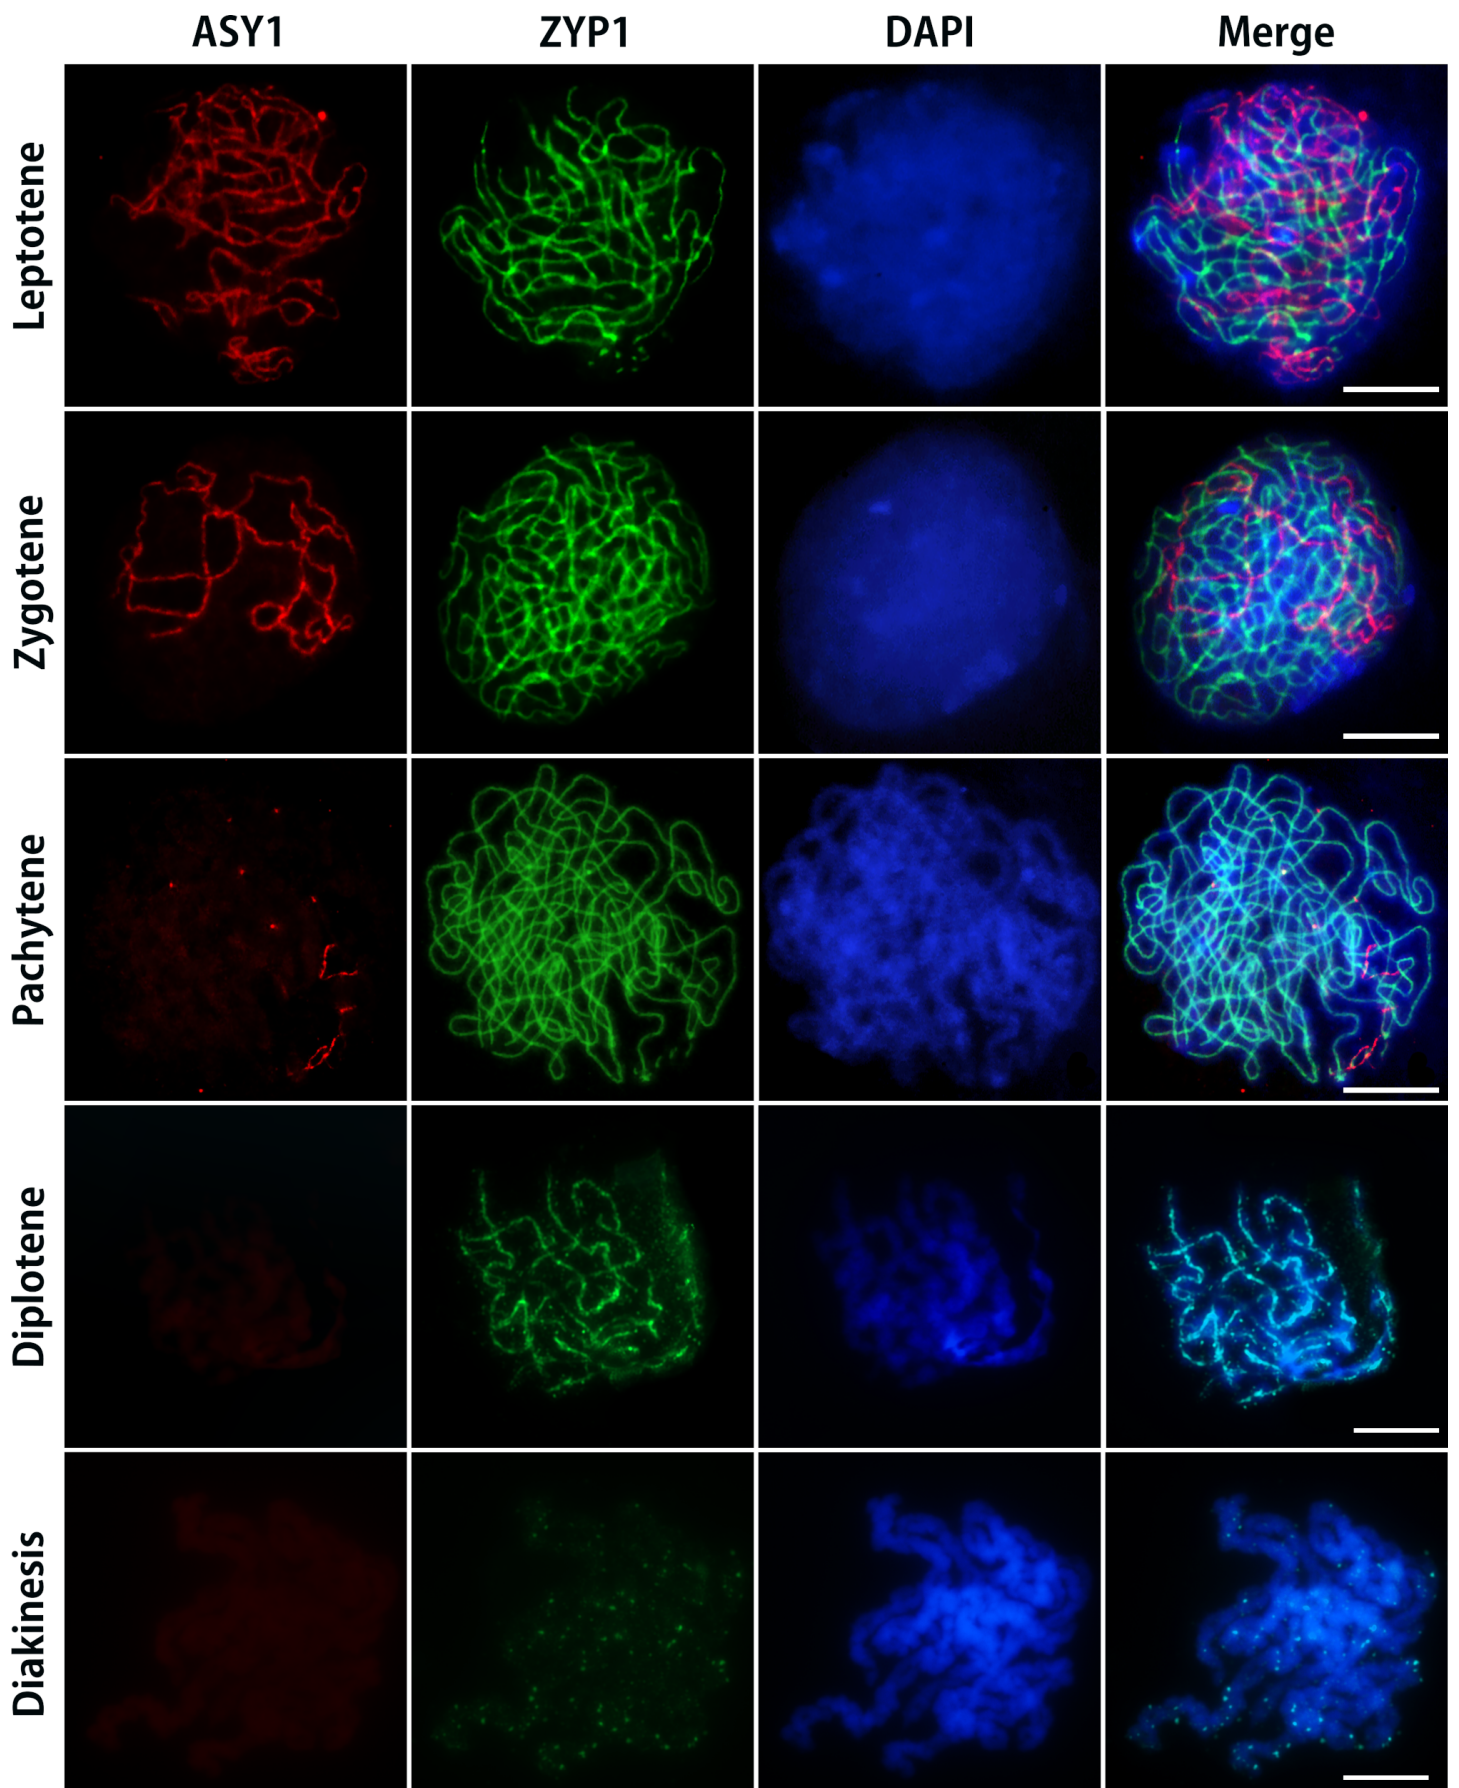

**Figure S2.** Synaptonemal complex formation in *A. cepa*. Nuclei at different meiotic stages immunostained with ASY1 (red) and ZYP1 (green) with DAPI counterstain (blue). Bar = 10  $\mu$ m. At pachytene, all homologous are synapsed. At diakinesis, complete disassembly of the SC with ball-like structures of ZYP1 signals occurs.

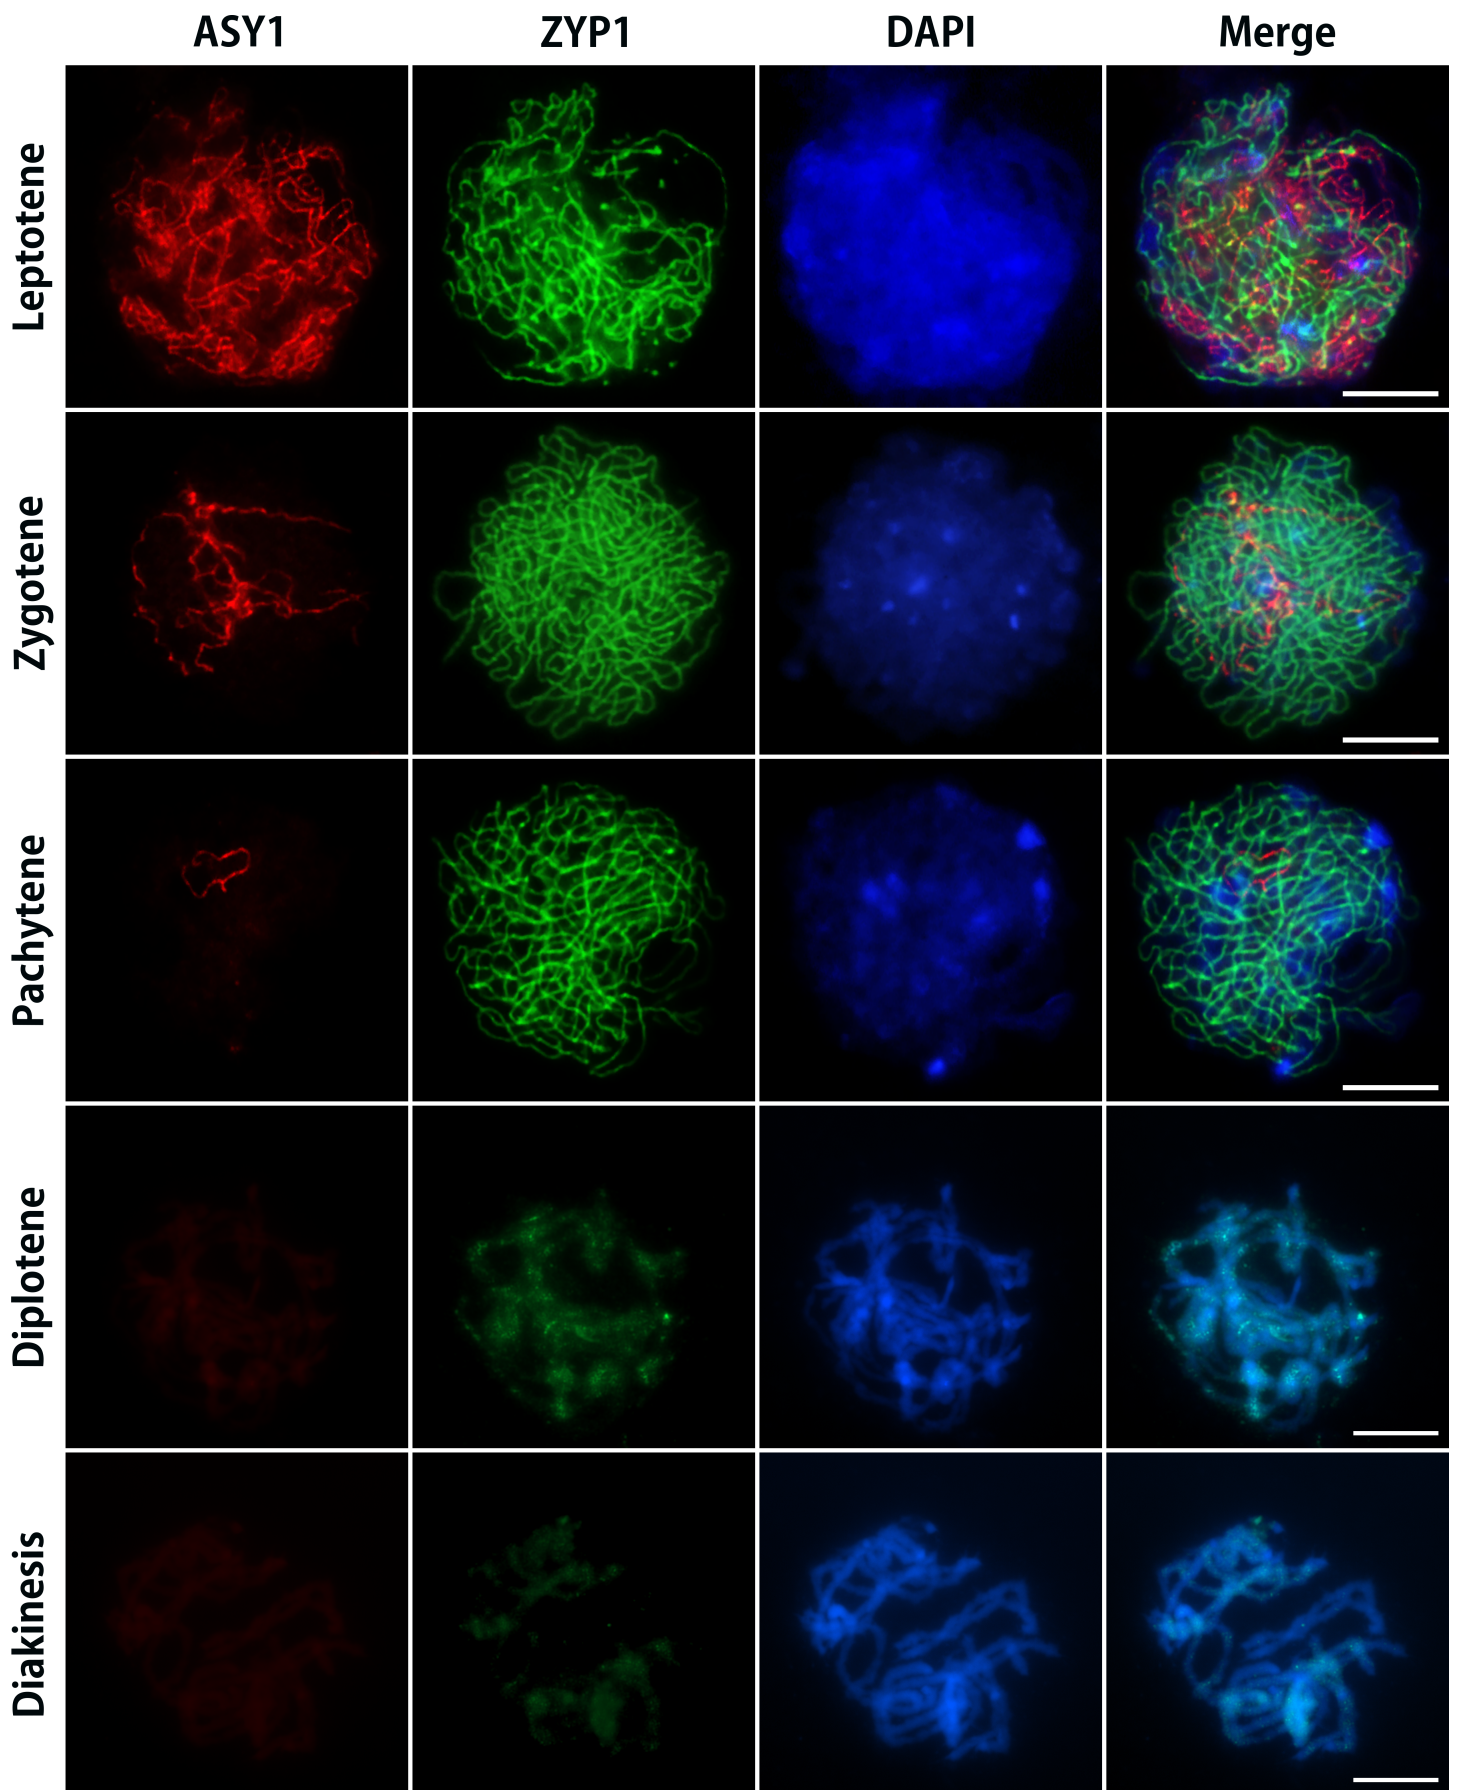

**Figure S3.** Synaptonemal complex formation in *A. fistulosum*. Nuclei at different meiotic stages immunostained with ASY1 (red) and ZYP1 (green) with DAPI counterstain (blue). Bar = 10  $\mu$ m. At pachytene, all homologous are synapsed. At diakinesis, complete disassembly of the SC with ball-like structures of ZYP1 signals occurs.

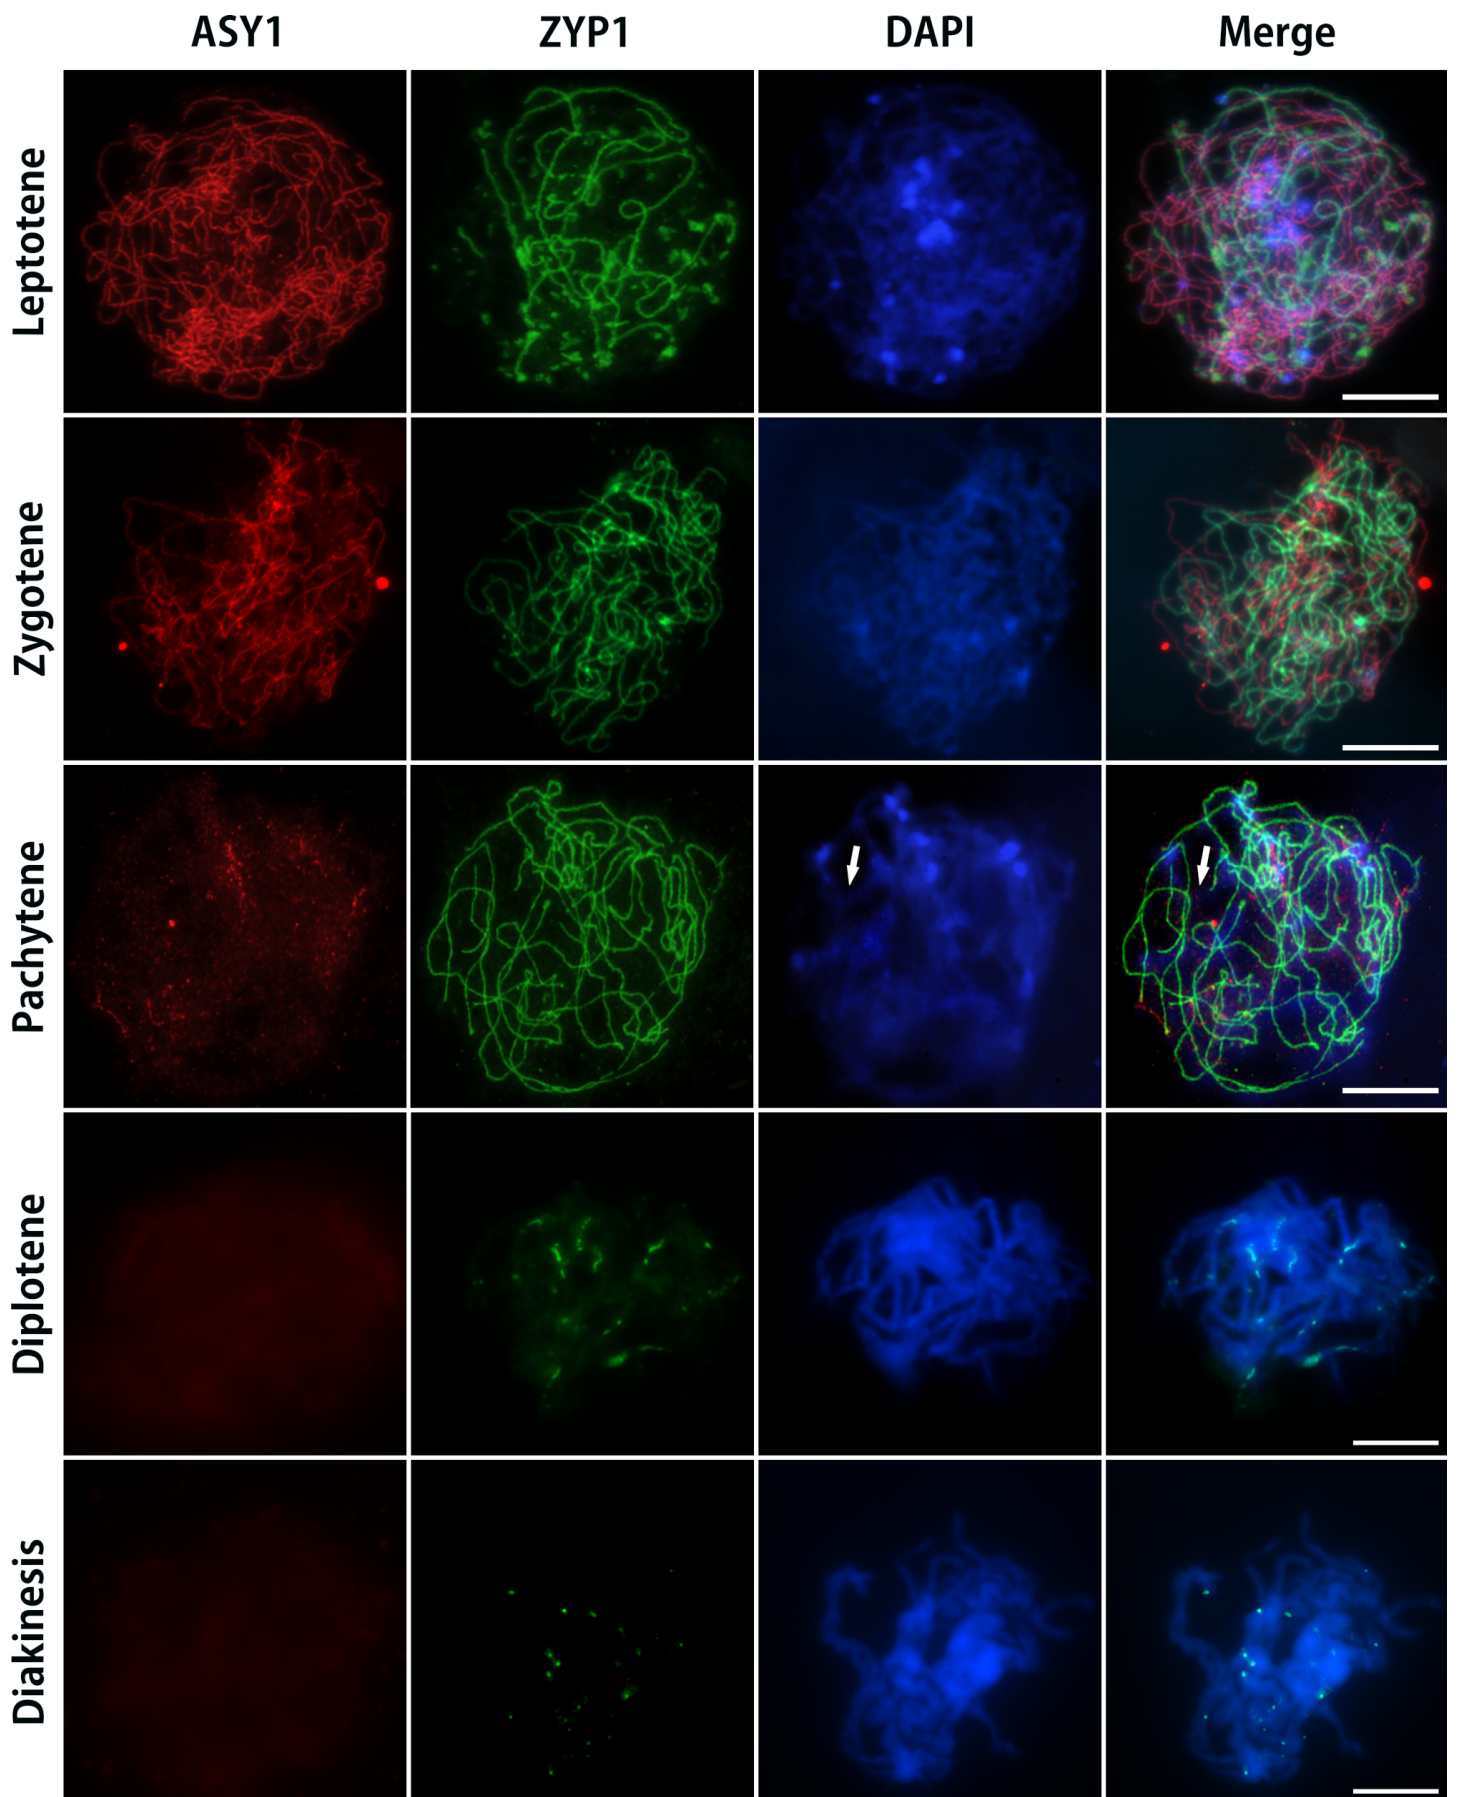

**Figure S4.** Synaptonemal complex formation in  $F_1$  diploid hybrid (*A. cepa*  $\times$  *A. fistulosum*) ( $2n = 2x = 8F+8C$ ). Nuclei at different meiotic stages immunostained with ASY1 (red) and ZYP1 (green) with DAPI counterstain (blue). Bar = 10  $\mu$ m. From leptotene to pachytene, synapsis delay was occurring between the chromosomes of *A. cepa* and *A. fistulosum*. The arrow indicates non-synapsed region between homeologous chromosomes. At diakinesis, complete disassembly of the SC with ball-like structures of ZYP1 signals occurs.

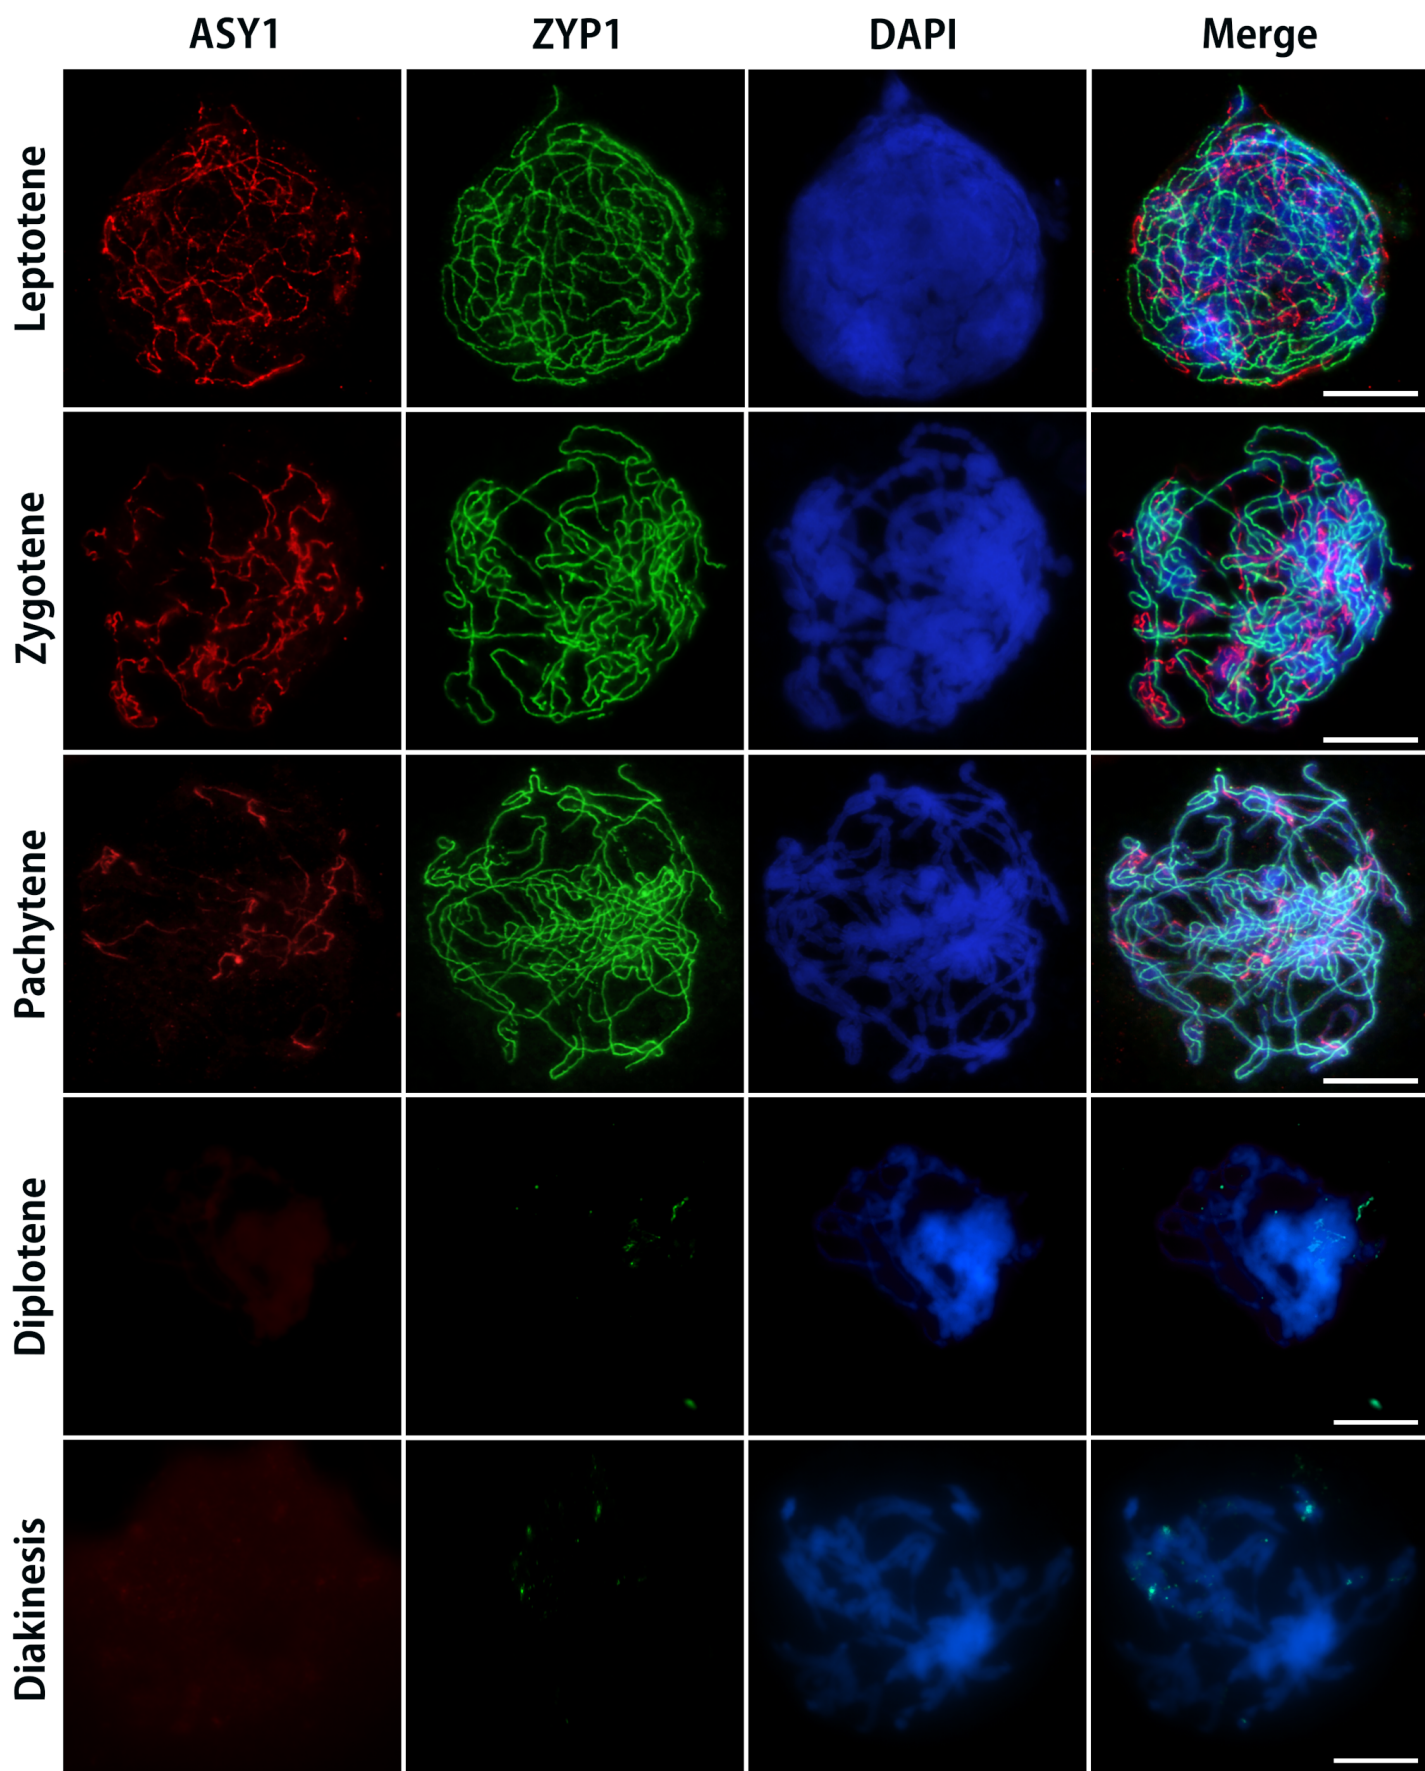

**Figure S5.** Synaptonemal complex formation in F<sub>1</sub> triploid hybrid (*A. cepa* × *A. fistulosum*) ( $2n = 3x = 16F+8C$ ). Nuclei at different meiotic stages immunostained with ASY1 (red) and ZYP1 (green) with DAPI counterstain (blue). Bar = 10  $\mu$ m. At pachytene, ASY1 long tracks can be explained by the presence of an unpaired set of *A. cepa* chromosomes, while short tracks of ASY1 probably derived from homoeologous chromosome pairing. At diakinesis, complete disassembly of the SC with ball-like structures of ZYP1 signals occurs.

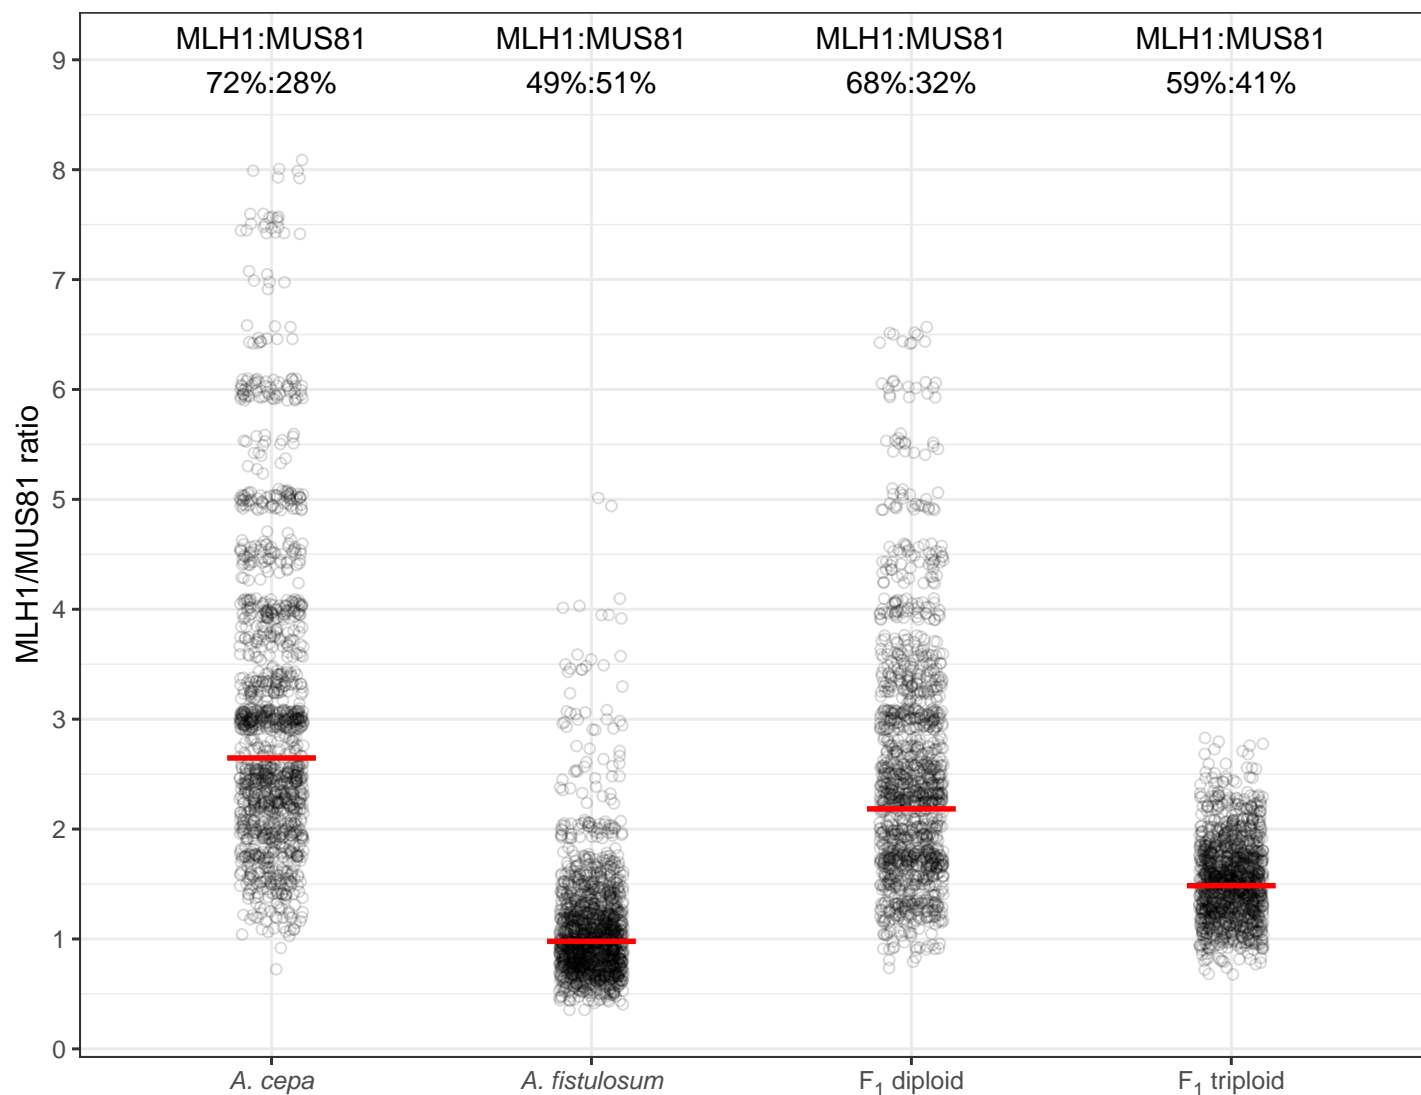

**Figure S6.** Distribution of MLH1/MUS81 ratio in all possible combinations of counted MLH1 and MUS81 foci per cell for *A. cepa*, *A. fistulosum*, F<sub>1</sub> (*A. cepa* × *A. fistulosum*) diploid and triploid hybrids. Red lines – weighted means with inverse weights in order to compensate effect from combinations with extreme MLH1/MUS81 ratios appearing because of artificial nature of generated population.

**Table S1.** Pairwise comparisons of MLH1 and MUS81 mean foci number per cell in *A. cepa*, *A. fistulosum*, F<sub>1</sub> (*A. cepa* × *A. fistulosum*) diploid and triploid hybrids.

a. MLH1

| Pairwise comparison                                            | Observed mean foci per cell difference | <i>P</i> value <sup>a</sup> |
|----------------------------------------------------------------|----------------------------------------|-----------------------------|
| <i>A. cepa</i> – <i>A. fistulosum</i>                          | 4.6                                    | <0.001                      |
| <i>A. cepa</i> – F <sub>1</sub> diploid hybrid <sup>b</sup>    | 2.6                                    | <0.001                      |
| <i>A. cepa</i> – F <sub>1</sub> triploid hybrid <sup>c</sup>   | 2.6                                    | <0.001                      |
| <i>A. fistulosum</i> – F <sub>1</sub> diploid hybrid           | -2.0                                   | <0.001                      |
| <i>A. fistulosum</i> – F <sub>1</sub> triploid hybrid          | -2.0                                   | <0.001                      |
| F <sub>1</sub> diploid hybrid – F <sub>1</sub> triploid hybrid | 0.0                                    | 0.8                         |

b. MUS81

| Pairwise comparison                                            | Observed mean foci per cell difference | <i>P</i> value <sup>a</sup> |
|----------------------------------------------------------------|----------------------------------------|-----------------------------|
| <i>A. cepa</i> – <i>A. fistulosum</i>                          | -2.4                                   | <0.001                      |
| <i>A. cepa</i> – F <sub>1</sub> diploid hybrid                 | 0.5                                    | 0.21                        |
| <i>A. cepa</i> – F <sub>1</sub> triploid hybrid                | -1.6                                   | <0.001                      |
| <i>A. fistulosum</i> – F <sub>1</sub> diploid hybrid           | 2.9                                    | <0.001                      |
| <i>A. fistulosum</i> – F <sub>1</sub> triploid hybrid          | 0.8                                    | 0.01                        |
| F <sub>1</sub> diploid hybrid – F <sub>1</sub> triploid hybrid | -2.1                                   | <0.001                      |

<sup>a</sup> Wilcoxon test, FDR 5% corrected

<sup>b</sup>  $2n = 2x = 8F+8C$

<sup>c</sup>  $2n = 3x = 16F+8C$
