# Supplementary material for: The Control of the Crossover Localization in Allium
Source: Int J Mol Sci. 2023 Apr 11;24(8):7066. doi: 10.3390/ijms24087066 (PMC10138942; doi:10.3390/ijms24087066)
Supplement: Supplementary file 1 [file ijms-24-07066-s001.zip › TablesS2_3.xlsx]

## Sheet: MLH1
Table S2. The frequency of MLH1 foci on ZYP1 tracks at pachytene of A. cepa, A. fistulosum and their F1 diploid and triploid hybrids
Allium cepa			Allium fistulosum			F1 diploid hybrid			F1 triploid hybrid
Slide #	Pachytene #	MLH1 foci # per pachytene spread	Slide #	Pachytene #	MLH1 foci # per pachytene spread	Slide #	Pachytene #	MLH1 foci # per pachytene spread	Slide #	Pachytene #	MLH1 foci # per pachytene spread
1	1	12	1	1	8	1	1	5	1	1	9
	2	10		2	5		2	7		2	8
	3	11		3	10		3	10		3	9
2	1	13		4	4		4	7	2	1	8
	2	9	2	1	7		5	6		2	9
	3	9		2	6		6	9		3	6
	4	10		3	6		7	12		4	8
	5	12		4	8	2	1	7		5	9
	6	16		5	6		2	10	3	1	9
	7	10		6	7	3	1	10		2	10
3	1	13	3	1	6		2	9		3	9
	2	12		2	7		3	9		4	11
	3	10		3	6		4	7		5	9
	4	15	4	1	7	4	1	8		6	7
	5	9		2	6		2	8		7	9
	6	6		3	5		3	9		8	6
4	1	12		4	6		4	6	4	1	9
	2	12	5	1	6	5	1	12		2	9
	3	9		2	6		2	11		3	7
	4	12		3	6		3	7		4	8
5	1	10	6	1	10		4	5	5	1	10
	2	9		2	6		5	7		2	8
	3	8		3	5	6	1	12		3	11
	4	12		4	7		2	5		4	8
	5	15		5	8		3	13		5	8
	6	14		6	6		4	5		6	9
6	1	10	7	1	8		5	7	6	1	10
	2	15		2	4		6	10		2	8
	3	11		3	6	7	1	5		3	10
7	1	12		4	7		2	6		4	8
	2	10	8	1	7		3	10		5	9
	3	9		2	7		4	11		6	6
	4	12		3	4		5	13		7	8
	5	9		4	6		6	9	7	1	10
8	1	12		5	7	8	1	11		2	7
	2	10	9	1	8		2	9		3	8
	3	9		2	7		3	7
				3	8		4	8
				4	5
				5	6

## Sheet: MUS81
Table S3. The frequency of MUS81 foci on ZYP1 tracks at pachytene of A. cepa, A. fistulosum and their F1 diploid and triploid hybrids
Allium cepa			Allium fistulosum			F1 diploid hybrid			F1 triploid hybrid
Slide #	Pachytene #	MUS81 foci # per pachytene spread	Slide #	Pachytene #	MUS81 foci # per pachytene spread	Slide #	Pachytene #	MUS81 foci # per pachytene spread	Slide #	Pachytene #	MUS81 foci # per pachytene spread
1	1	3	1	1	7	1	1	4	1	1	5
	2	4		2	8		2	3		2	7
	3	2		3	8		3	3		3	5
	4	3		4	7		4	2	2	1	4
	5	5	2	1	6		5	6		2	5
2	1	6		2	2	2	1	4		3	5
	2	4		3	4		2	5		4	6
	3	2		4	9		3	3	3	1	5
	4	4		5	9	3	1	4		2	8
	5	8		6	5		2	4		3	6
	6	3		7	9	4	1	2		4	7
3	1	6	3	1	7		2	4		5	6
	2	3		2	5		3	2		6	5
	3	4		3	9		4	4	4	1	6
	4	4		4	4	5	1	4		2	4
	5	7		5	6		2	3		3	8
	6	3	4	1	8		3	3		4	6
	7	2		2	5	6	1	3	5	1	4
4	1	2		3	9		2	4		2	5
	2	4		4	7		3	3		3	6
	3	5	5	1	4		4	4		4	6
5	1	4		2	6		5	5		5	5
	2	5		3	5		6	4		6	5
	3	3		4	8		7	3		7	6
	4	5		5	8	7	1	2		8	5
	5	4		6	7		2	3	6	1	6
	6	6	6	1	5		3	5		2	6
6	1	4		2	9		4	4		3	7
	2	2		3	6		5	5		4	4
	3	6		4	3	8	1	2	7	1	6
	4	4		5	7		2	4		2	5
	5	4		6	6		3	3		3	5
	6	5	7	1	7		4	4		4	6
	7	2		2	5		5	5		5	8
7	1	4		3	6		6	4	8	1	6
	2	4		4	8		7	4		2	5
	3	3	8	1	6		8	3		3	7
	4	5		2	7					4	6
	5	4		3	6
				4	8
